# Supplementary material
Source: PubMed Central journal article supplement (PMC3865449)
Supplement: NIHMS362685-supplement-Appendix_A.pdf [file NIHMS362685-supplement-Appendix_A.pdf]

What is your overall impression of bariatric surgery as a treatment for obesity?

- Very positive
- Positive
- Neutral
- Negative
- Very negative

Which, if any, bariatric surgeries have you recommended to a patient as a treatment for obesity? (check all that apply)

- Gastric bypass
- Lap Band ®
- Sleeve gastrectomy
- None
- Other (specify)

What is your overall impression of bariatric surgery as a treatment for type 2 diabetes?

- Very positive
- Positive
- Neutral
- Negative
- Very negative

Which, if any, bariatric surgeries do you think are effective for treating type 2 diabetes? (check all that apply)

- Gastric bypass
- Lap Band ®
- Sleeve gastrectomy
- None
- Other (specify)

Have you ever, or do you plan to see patients who have type 2 diabetes?

- Yes
- No
- Unknown

Which, if any, **bariatric surgeries** have you recommended for your **obese type 2 diabetic** patients? (check all that apply)

- Gastric bypass
- Lap Band ®
- Sleeve gastrectomy
- None
- Other (specify)

Please indicate whether or not the following factors and outcomes would be important or not important for recommending **bariatric surgery** to your **obese type 2 diabetic** patients. (please check all)

|                                              | Important             | Not important         |
|----------------------------------------------|-----------------------|-----------------------|
| Patient requests procedure                   | <input type="radio"/> | <input type="radio"/> |
| Patient has exhausted all other options      | <input type="radio"/> | <input type="radio"/> |
| Patient is mildly obese (BMI 30-34.9)        | <input type="radio"/> | <input type="radio"/> |
| Patient is moderately obese (BMI 35-39.9)    | <input type="radio"/> | <input type="radio"/> |
| Patient is severely obese (BMI 40 and above) | <input type="radio"/> | <input type="radio"/> |
| Diabetes remission or amelioration           | <input type="radio"/> | <input type="radio"/> |
| Low risk of complications                    | <input type="radio"/> | <input type="radio"/> |
| Reversibility of procedure                   | <input type="radio"/> | <input type="radio"/> |
| Insurance coverage of operation              | <input type="radio"/> | <input type="radio"/> |
| Rapid improvement in health                  | <input type="radio"/> | <input type="radio"/> |
| Other (specify)                              | <input type="radio"/> | <input type="radio"/> |

How willing would you be to recommend your **obese** patients with **type 2 diabetes** to participate in a research study in which they have a chance of being **randomly** assigned these interventions (assuming no medical contraindications and no cost to participants)?

For the interventions that you **do not** recommend, select "very unwilling."

|                                                                                                                                  | Very Willing          | Willing               | Neutral               | Unwilling             | Very Unwilling        |
|----------------------------------------------------------------------------------------------------------------------------------|-----------------------|-----------------------|-----------------------|-----------------------|-----------------------|
| <b>Self-directed weight loss</b><br>(e.g., dieting, cutting calories, or using Atkins, South Beach, etc.)                        | <input type="radio"/> |
| <b>One-on-one dietary counseling</b>                                                                                             | <input type="radio"/> |
| <b>Exercise programs</b><br>(e.g., with a personal trainer, physical therapist, etc.)                                            | <input type="radio"/> |
| <b>Formal weight loss programs</b><br>(e.g, Weight Watchers®, Jenny Craig®, Nutrisystem®, LA Weight Loss®, hospital-based, etc.) | <input type="radio"/> |
| <b>Dietary supplements for weight loss</b><br>(e.g., Herbal-life, Ephedrine, Dexatrim, etc.)                                     | <input type="radio"/> |
| <b>Prescription weight loss medication</b><br>(e.g., sibutramine, orlistat, phentermine)                                         | <input type="radio"/> |
| <b>Meal replacements</b><br>(e.g., Slimfast, Ensure, etc.)                                                                       | <input type="radio"/> |
| <b>Weight loss surgery</b><br>(e.g., gastric bypass, Lap Band® surgery, etc.)                                                    | <input type="radio"/> |
| <b>Diabetes education classes</b><br>(e.g., at a hospital, doctor's office, etc.)                                                | <input type="radio"/> |
| <b>Oral diabetes medication</b><br>(e.g., diabetes pills)                                                                        | <input type="radio"/> |
| <b>Insulin</b><br>(e.g., Aspart, Lispro, Glargine, etc.)                                                                         | <input type="radio"/> |
| <b>Other injections for diabetes</b><br>(e.g., Byetta or Symlin, but not insulin)                                                | <input type="radio"/> |
| <b>Other (specify)</b>                                                                                                           | <input type="radio"/> |

What do you think is the likelihood that your obese type 2 diabetic patients would have a significant improvement in type 2 diabetes with:

|                            | Very likely           | Likely                | Neutral               | Unlikely              | Very unlikely         |
|----------------------------|-----------------------|-----------------------|-----------------------|-----------------------|-----------------------|
| Gastric bypass surgery     | <input type="radio"/> |
| Lap Band ® surgery         | <input type="radio"/> |
| Sleeve gastrectomy surgery | <input type="radio"/> |
| Weight loss medications    | <input type="radio"/> |
| Diet and exercise          | <input type="radio"/> |

What do you think is the likelihood of a **complication** (not death) from:

|                            | Very likely           | Likely                | Neutral               | Unlikely              | Very unlikely         |
|----------------------------|-----------------------|-----------------------|-----------------------|-----------------------|-----------------------|
| Gastric bypass surgery     | <input type="radio"/> |
| Lap Band ® surgery         | <input type="radio"/> |
| Sleeve gastrectomy surgery | <input type="radio"/> |
| Weight loss medications    | <input type="radio"/> |
| Diet and exercise          | <input type="radio"/> |

What do you think is the likelihood of **death** from:

|                            | Very likely           | Likely                | Neutral               | Unlikely              | Very unlikely         |
|----------------------------|-----------------------|-----------------------|-----------------------|-----------------------|-----------------------|
| Gastric bypass surgery     | <input type="radio"/> |
| Lap Band ® surgery         | <input type="radio"/> |
| Sleeve gastrectomy surgery | <input type="radio"/> |
| Weight loss medications    | <input type="radio"/> |
| Diet and exercise          | <input type="radio"/> |

We are conducting an NIH-funded research study that randomly assigns type 2 diabetics to receive either (1) gastric bypass surgery, (2) gastric banding surgery, or (3) a non-surgical diet and exercise program. Over the course of 1 year after the start of treatment, type 2 diabetes status is monitored in each participant to help us better understand improvements in type 2 diabetes after different methods of weight loss. Assuming no medical contraindications and no cost to participants:

How likely is it that you would refer a patient with a BMI of 30-34.9 kg/m<sup>2</sup> and type 2 diabetes to this study?

- Very likely
- Likely
- Neutral
- Unlikely
- Very unlikely

How likely is it that you would refer a patient with a BMI of 35-39.9 kg/m<sup>2</sup> and type 2 diabetes to this study?

- Very likely
- Likely
- Neutral
- Unlikely
- Very unlikely

How likely is it that you would refer a patient with a BMI of 40 kg/m<sup>2</sup> and above and type 2 diabetes to this study?

- Very likely
- Likely
- Neutral
- Unlikely
- Very unlikely

How many years have you been practicing medicine since completing residency?

What is your specialty board status?

- Board Certified
- Board Eligible
- Subspecialty Board Certified in

What is your primary specialty?

- Endocrinology
- Family Medicine
- Internal Medicine, non-subspecialty trained
- Internal Medicine, subspecialty trained
- Other (specify)

What statements best describe your practice? (Check all that apply)

- Solo practice
- Group practice
- Teaching hospital practice
- Other (specify)



What is your work zip/postal code?

What is your home zip/postal code?

How old are you?

What is your gender?

- Male
- Female

What is your race/ethnicity? (check all that apply)

- White
- Black or African American
- Hispanic or Latino
- Asian
- Native Hawaiian or Other Pacific Islander
- American Indian or Alaska Native
- Other (specify)

How tall are you?

How much do you weigh (lb)?
